# Supplementary material for: Exploration of iron borides as electrochemical catalysts for the nitrogen reduction reaction
Source: Royal Society of Chemistry journal article supplement (doi:10.1039/c9ta04650j), 2019-01-01
Supplement: c9ta04650j1.pdf [file c9ta04650j1.pdf]

## Supporting Information

# Exploration of iron borides as electrochemical catalysts for nitrogen reduction reaction

Qinye Li,<sup>a</sup> Chuangwei Liu,<sup>b</sup> Siyao Qiu,<sup>c</sup> Fengling Zhou,<sup>c</sup> Lizhong He,<sup>a</sup> Xiwang Zhang,<sup>\*a</sup> and Chenghua Sun<sup>\*cd</sup>

<sup>a</sup> School of Chemical Engineering, Monash University, Clayton, Victoria 3800, Australia. E-mail: [xiwang.zhang@monash.edu](mailto:xiwang.zhang@monash.edu)

<sup>b</sup> School of Chemistry, Faculty of Science, Monash University, Clayton, Victoria 3800, Australia

<sup>c</sup> Science & Technology Innovation Institute, Dongguan University of Technology, Dongguan, China

<sup>d</sup> Department of Chemistry and Biotechnology, and Centre for Translational Atomaterials, FSET, Swinburne University of Technology, Hawthorn, Victoria 3122, Australia. E-mail: [chenghuasun@swin.edu.au](mailto:chenghuasun@swin.edu.au)

### Section 1. Computational tests

Before running the calculations, cutoff energy and k-points have been tested, using FeB and FeB-N<sub>2</sub> as an example. The tested results are shown below:

|                             | Cutoff energy test with K=1×1×1 |          |          | K-point test with Cutoff energy=380 eV |          |          |
|-----------------------------|---------------------------------|----------|----------|----------------------------------------|----------|----------|
|                             | 380 eV                          | 420 eV   | 450 eV   | 1×1×1                                  | 3×3×1    | 5×5×1    |
| E(FeB) (eV)                 | -227.486                        | -227.464 | -227.461 | -227.486                               | -229.753 | -229.696 |
| E(FeB-N <sub>2</sub> ) (eV) | -248.744                        | -248.746 | -248.747 | -248.744                               | -250.946 | -250.892 |

Based on the tests, cutoff energy of 380 eV and k-space has been sampled with 3×3×1 as higher setting can only improve the reaction energy slightly (<0.06 eV).

## Section 2. Space groups and lattice parameters for four Fe-B compounds

|                  | Space Group | Lattice parameters                                                                                                                                           |                              |
|------------------|-------------|--------------------------------------------------------------------------------------------------------------------------------------------------------------|------------------------------|
| FeB              | Pnma        | a= 4.00 Å b=5.41 Å; c= 2.95 Å(this work)<br>$\alpha = \beta = \gamma = 90^\circ$<br><br>a=4.05 Å; b= 5.49 Å; c= 2.95 Å [1,2]                                 | Note                         |
| FeB2             | P6/mmm      | a= b= 3.01 Å (this work)<br>$\alpha = \beta = 90^\circ; \gamma = 120^\circ$<br><br>a=b=3.05 Å [2]<br><br>a= b = 3.18 [3]<br>a= b = 3.02 [4]                  | FeB+FeB2 mixed;<br>AlB2-type |
| FeB6( $\alpha$ ) | P6/mmm      | a= b = 4.46 Å<br>$\alpha = \beta = 90^\circ; \gamma = 88.05^\circ$ (this work)<br><br>a= b = 4.45 Å [5]<br>$\alpha = \beta = 90^\circ; \gamma = 88.05^\circ$ | Jahn–Teller effect           |
| FeB6( $\beta$ )  | P6/mmm      | a=b=4.80 (this work)<br>$\alpha = \beta = 90^\circ; \gamma = 120^\circ$<br><br>a=b=4.75 [6]<br>$\alpha = \beta = 90^\circ; \gamma = 120^\circ$               |                              |

### References:

- [1] Z. Kristallogr. 2006, 221, 477–481 (Experiments)
- [2] *Metal Science and Heat Treatment*. 2013, 55, 68–72. (Experiments)
- [3] Nano Lett. 2016, 16, 6124-6129 (Computational work)
- [4] Materials Project. (No. mp-569376) <https://materialsproject.org/materials/mp-569376/>
- [5] J. Am. Chem. Soc. 2016, 138, 5644–5651.
- [6] J. Mater. Chem. C, 2016, 4, 9613—9621.

**Section 3. Tests for N<sub>2</sub> adsorption on four compounds.** Calculated total energies are listed in unit of eV. The bold numbers are the total energies for most stable configurations.

**Tested N<sub>2</sub> adsorption**

|                                              | Fe-site         | Fe-B sites | Fe-Fe sites      | Enzymatic | Dissociative    | B-Site   |
|----------------------------------------------|-----------------|------------|------------------|-----------|-----------------|----------|
| FeB-N <sub>2</sub>                           | <b>-250.892</b> | -248.611   | -248.865         | -248.074  | -247.751        | -249.241 |
| FeB <sub>2</sub> -N <sub>2</sub>             | -202.791        | -202.790*  | -202.764         | -201.796  | <b>-203.472</b> | -200.332 |
| FeB <sub>6</sub> ( $\alpha$ )-N <sub>2</sub> | <b>-111.527</b> | -111.408   | Fe-Fe is too far | -110.833  | -108.384        | -109.484 |
| FeB <sub>6</sub> ( $\beta$ )-N <sub>2</sub>  | <b>-111.464</b> | -111.241   | Fe-Fe is too far | -111.194  | -105.886        | -110.546 |

\* It changes to sole Fe-site adsorption.

**Calculated N<sub>2</sub>H dissociation on four compounds.**

| Catalysts                     | N <sub>2</sub> H* | N*+NH*   | deltaE(N <sub>2</sub> H*→N*+NH*) |
|-------------------------------|-------------------|----------|----------------------------------|
| FeB                           | -253.486          | -251.961 | 1.525                            |
| FeB <sub>2</sub>              | -204.812          | -207.208 | -2.396                           |
| FeB <sub>6</sub> ( $\alpha$ ) | -204.328          | -202.481 | 1.847                            |
| FeB <sub>6</sub> ( $\beta$ )  | -111.655          | -110.003 | 1.652                            |

## Section 4. Optimized geometries of intermediate states for NRR over FeB and FeB<sub>2</sub>

### FeB-N<sub>2</sub>

FeB

1.0

|               |              |               |
|---------------|--------------|---------------|
| 10.8163995743 | 0.0000000000 | 0.0000000000  |
| 0.0000000000  | 5.8972001076 | 0.0000000000  |
| 0.0000000000  | 0.0000000000 | 20.0000000000 |

| Fe | B  | N |
|----|----|---|
| 16 | 16 | 2 |

Direct

|             |             |             |
|-------------|-------------|-------------|
| 0.099082001 | 0.123988003 | 0.216748998 |
| 0.156790003 | 0.375999987 | 0.321002990 |
| 0.399646997 | 0.375845999 | 0.359100014 |
| 0.334643006 | 0.127841994 | 0.253030986 |
| 0.595624983 | 0.128560007 | 0.216481999 |
| 0.659142017 | 0.375465989 | 0.320706993 |
| 0.896109998 | 0.375903010 | 0.353872001 |
| 0.833307981 | 0.127298996 | 0.250367999 |
| 0.099118002 | 0.627067983 | 0.216768995 |
| 0.159118995 | 0.876092970 | 0.321204990 |
| 0.398624003 | 0.875706971 | 0.356276989 |
| 0.334652990 | 0.623579979 | 0.253060013 |
| 0.595618010 | 0.622617006 | 0.216484994 |
| 0.658738017 | 0.875446022 | 0.319867998 |
| 0.896992028 | 0.875715017 | 0.353850007 |
| 0.833329976 | 0.623947024 | 0.250366986 |
| 0.008607000 | 0.125642002 | 0.309311986 |
| 0.222923994 | 0.375642985 | 0.218208000 |
| 0.482634008 | 0.375613987 | 0.262683004 |
| 0.273443997 | 0.128610998 | 0.352901012 |
| 0.509130001 | 0.125404999 | 0.310169995 |
| 0.720992029 | 0.375562996 | 0.214589000 |
| 0.985091984 | 0.375690997 | 0.260650992 |
| 0.772283018 | 0.124618001 | 0.354211986 |
| 0.008645000 | 0.625760972 | 0.309271008 |
| 0.224805996 | 0.875606000 | 0.216774002 |
| 0.483206987 | 0.875575006 | 0.261413008 |
| 0.273335993 | 0.623404980 | 0.352990001 |
| 0.509214997 | 0.625868022 | 0.310209990 |
| 0.718932986 | 0.875588000 | 0.218308002 |
| 0.984547973 | 0.875651002 | 0.260843992 |
| 0.772217989 | 0.626761019 | 0.354313999 |
| 0.437159985 | 0.375670999 | 0.448709011 |
| 0.460045010 | 0.376168013 | 0.504028976 |

## FeB-N2H

FeB

1.0

|               |              |               |
|---------------|--------------|---------------|
| 10.8163995743 | 0.0000000000 | 0.0000000000  |
| 0.0000000000  | 5.8972001076 | 0.0000000000  |
| 0.0000000000  | 0.0000000000 | 20.0000000000 |

|    |    |   |   |
|----|----|---|---|
| Fe | B  | N | H |
| 16 | 16 | 2 | 1 |

Direct

|             |             |             |
|-------------|-------------|-------------|
| 0.098531000 | 0.125376999 | 0.216820002 |
| 0.155615002 | 0.376457006 | 0.320672989 |
| 0.396097004 | 0.376026005 | 0.366349012 |
| 0.333303988 | 0.130244002 | 0.254940003 |
| 0.591969013 | 0.120411001 | 0.219667003 |
| 0.658770025 | 0.376217008 | 0.322663993 |
| 0.896687984 | 0.376107007 | 0.354274005 |
| 0.830669999 | 0.125637993 | 0.251284987 |
| 0.098569997 | 0.627089977 | 0.216822997 |
| 0.157122999 | 0.876049995 | 0.321289003 |
| 0.396176010 | 0.872823000 | 0.358644009 |
| 0.333241999 | 0.622227013 | 0.254947007 |
| 0.591938019 | 0.631994009 | 0.219670996 |
| 0.656138003 | 0.876146019 | 0.322632015 |
| 0.895784974 | 0.876376987 | 0.354043990 |
| 0.830649972 | 0.626818001 | 0.251282007 |
| 0.006913000 | 0.125729993 | 0.308943987 |
| 0.222848997 | 0.376347989 | 0.218596995 |
| 0.482829988 | 0.376246005 | 0.265437990 |
| 0.269872010 | 0.126748994 | 0.353000998 |
| 0.506729007 | 0.127197996 | 0.312655002 |
| 0.712929010 | 0.376239985 | 0.221773997 |
| 0.983088017 | 0.376367986 | 0.260224015 |
| 0.771723986 | 0.126001000 | 0.355984986 |
| 0.006816000 | 0.626721978 | 0.308932006 |
| 0.224286005 | 0.876227021 | 0.218484998 |
| 0.478073001 | 0.876276016 | 0.264120996 |
| 0.269908994 | 0.625588000 | 0.353222013 |
| 0.506677985 | 0.625051022 | 0.312698007 |
| 0.718915999 | 0.876242995 | 0.216216996 |
| 0.983319998 | 0.876209021 | 0.260740995 |
| 0.771827996 | 0.626416028 | 0.355883986 |
| 0.421858013 | 0.374837995 | 0.449014008 |
| 0.427311003 | 0.372693002 | 0.509396970 |
| 0.515053988 | 0.377732009 | 0.529217005 |

**FeB-NHNH**

1.0

|               |              |               |
|---------------|--------------|---------------|
| 10.8163995743 | 0.0000000000 | 0.0000000000  |
| 0.0000000000  | 5.8972001076 | 0.0000000000  |
| 0.0000000000  | 0.0000000000 | 20.0000000000 |

|    |    |   |   |
|----|----|---|---|
| Fe | B  | N | H |
| 16 | 16 | 2 | 2 |

Direct

|             |             |             |
|-------------|-------------|-------------|
| 0.095663004 | 0.154369995 | 0.222624004 |
| 0.157414004 | 0.410899013 | 0.326384008 |
| 0.401596993 | 0.391216010 | 0.362962991 |
| 0.330996990 | 0.154159993 | 0.255661994 |
| 0.593113005 | 0.154306993 | 0.218158007 |
| 0.654193997 | 0.407808989 | 0.322474003 |
| 0.890419006 | 0.402220011 | 0.358440012 |
| 0.830864012 | 0.154384002 | 0.254673004 |
| 0.094844997 | 0.654004991 | 0.222027004 |
| 0.157386005 | 0.897499025 | 0.326391011 |
| 0.401472986 | 0.917021990 | 0.362978011 |
| 0.329901010 | 0.654034972 | 0.257784009 |
| 0.592576027 | 0.654223025 | 0.218560994 |
| 0.654182017 | 0.900843024 | 0.322461993 |
| 0.890453994 | 0.906522989 | 0.358464986 |
| 0.831351995 | 0.654340982 | 0.254442990 |
| 0.006692000 | 0.154277995 | 0.315095007 |
| 0.220328003 | 0.404626995 | 0.221367002 |
| 0.478715003 | 0.407151014 | 0.264665991 |
| 0.270857990 | 0.154149994 | 0.353549987 |
| 0.507344007 | 0.154257998 | 0.309289992 |
| 0.717473984 | 0.403580010 | 0.220605999 |
| 0.982553005 | 0.404038996 | 0.266728014 |
| 0.764545023 | 0.154385999 | 0.357849985 |
| 0.004822000 | 0.654309988 | 0.315494001 |
| 0.220111996 | 0.903654993 | 0.221579000 |
| 0.478675991 | 0.901126027 | 0.264687985 |
| 0.282687008 | 0.654102027 | 0.358202010 |
| 0.499879003 | 0.654202998 | 0.315281004 |
| 0.717424989 | 0.905035019 | 0.220615000 |
| 0.982635021 | 0.904509008 | 0.266705006 |
| 0.767104983 | 0.654327989 | 0.358067989 |
| 0.451747000 | 0.265498012 | 0.445964009 |
| 0.451400995 | 0.042390000 | 0.446056992 |
| 0.495299011 | 0.969371021 | 0.486230999 |
| 0.496812999 | 0.338378996 | 0.485864997 |

## FeB-NNH2

1.0

|               |              |               |
|---------------|--------------|---------------|
| 10.8163995743 | 0.0000000000 | 0.0000000000  |
| 0.0000000000  | 5.8972001076 | 0.0000000000  |
| 0.0000000000  | 0.0000000000 | 20.0000000000 |

|    |    |   |   |
|----|----|---|---|
| Fe | B  | N | H |
| 16 | 16 | 2 | 2 |

Direct

|             |             |             |
|-------------|-------------|-------------|
| 0.107326001 | 0.125227004 | 0.218647003 |
| 0.165530995 | 0.374862999 | 0.322007000 |
| 0.407649010 | 0.374902993 | 0.368598014 |
| 0.341751993 | 0.128191993 | 0.256381005 |
| 0.600585997 | 0.118308000 | 0.219301000 |
| 0.668896019 | 0.374565989 | 0.321794003 |
| 0.905430973 | 0.374392003 | 0.354911000 |
| 0.840213001 | 0.123595998 | 0.251450002 |
| 0.107395001 | 0.624471009 | 0.218563005 |
| 0.166906998 | 0.874577999 | 0.323372006 |
| 0.406544000 | 0.874844015 | 0.359943986 |
| 0.341937989 | 0.621538997 | 0.256375998 |
| 0.600580990 | 0.631527007 | 0.219313994 |
| 0.665130973 | 0.875473022 | 0.322982997 |
| 0.903630018 | 0.875479996 | 0.354799002 |
| 0.840022981 | 0.626219988 | 0.251563996 |
| 0.016403001 | 0.124369003 | 0.310618997 |
| 0.232274994 | 0.374890000 | 0.219634995 |
| 0.492231011 | 0.374972999 | 0.265747011 |
| 0.280423999 | 0.126580000 | 0.354797989 |
| 0.516270995 | 0.126212001 | 0.312669992 |
| 0.722276986 | 0.374980003 | 0.221992999 |
| 0.991841972 | 0.375003010 | 0.261638999 |
| 0.779760003 | 0.125516996 | 0.356693000 |
| 0.016155001 | 0.625310004 | 0.310665011 |
| 0.232302994 | 0.874835014 | 0.220135003 |
| 0.486797005 | 0.874715984 | 0.264697999 |
| 0.280712008 | 0.622587979 | 0.354939997 |
| 0.516364992 | 0.623728991 | 0.312844992 |
| 0.728079975 | 0.874804974 | 0.216372997 |
| 0.993203998 | 0.874776006 | 0.262293994 |
| 0.780156016 | 0.624489009 | 0.355924010 |
| 0.426613986 | 0.372860014 | 0.454694003 |
| 0.359604001 | 0.389721006 | 0.507317007 |
| 0.265617013 | 0.412501991 | 0.504734993 |
| 0.400316000 | 0.380194992 | 0.553363979 |

## FeB-NHNH2

1.0

|               |              |               |
|---------------|--------------|---------------|
| 10.8163995743 | 0.0000000000 | 0.0000000000  |
| 0.0000000000  | 5.8972001076 | 0.0000000000  |
| 0.0000000000  | 0.0000000000 | 20.0000000000 |

| Fe | B  | N | H |
|----|----|---|---|
| 16 | 16 | 2 | 3 |

Direct

|             |             |             |
|-------------|-------------|-------------|
| 0.101081997 | 0.120151997 | 0.221663997 |
| 0.162028998 | 0.371753007 | 0.324800014 |
| 0.407413006 | 0.374673009 | 0.362437993 |
| 0.336867005 | 0.122706003 | 0.255584002 |
| 0.597676992 | 0.127753004 | 0.217584997 |
| 0.661596000 | 0.373163998 | 0.321806997 |
| 0.896826029 | 0.373546004 | 0.357468992 |
| 0.837181985 | 0.126376003 | 0.252995014 |
| 0.100869000 | 0.627771020 | 0.221454993 |
| 0.162266999 | 0.876350999 | 0.325946003 |
| 0.403672993 | 0.873803020 | 0.359272987 |
| 0.337336987 | 0.624355972 | 0.254920006 |
| 0.599237025 | 0.620480001 | 0.217810005 |
| 0.661217988 | 0.875096023 | 0.321709007 |
| 0.897579014 | 0.874687016 | 0.357405007 |
| 0.836952984 | 0.622380972 | 0.253565997 |
| 0.010958000 | 0.124352999 | 0.314043999 |
| 0.224102005 | 0.373768985 | 0.223300993 |
| 0.484553993 | 0.373712003 | 0.263401985 |
| 0.279680014 | 0.128479004 | 0.357066005 |
| 0.511982977 | 0.125360996 | 0.311010003 |
| 0.725302994 | 0.374559999 | 0.217225999 |
| 0.988615990 | 0.374251992 | 0.265280008 |
| 0.772130013 | 0.123498999 | 0.357937992 |
| 0.011199000 | 0.623717010 | 0.314141005 |
| 0.227472007 | 0.873861015 | 0.218419001 |
| 0.487733990 | 0.873947024 | 0.263334006 |
| 0.278488994 | 0.620540023 | 0.353349000 |
| 0.512802005 | 0.623944998 | 0.310838997 |
| 0.722571015 | 0.873812020 | 0.221015006 |
| 0.986748993 | 0.873854995 | 0.265505999 |
| 0.772682011 | 0.625024021 | 0.356837988 |
| 0.454656005 | 0.406994998 | 0.449274004 |
| 0.394419014 | 0.335420996 | 0.506130993 |
| 0.305620015 | 0.292373002 | 0.494531006 |
| 0.398528993 | 0.448136985 | 0.545002997 |
| 0.536529005 | 0.483527005 | 0.460815996 |



**FeB-NH2NH2**

1.0

|               |              |               |
|---------------|--------------|---------------|
| 10.8163995743 | 0.0000000000 | 0.0000000000  |
| 0.0000000000  | 5.8972001076 | 0.0000000000  |
| 0.0000000000  | 0.0000000000 | 20.0000000000 |

|    |    |   |   |
|----|----|---|---|
| Fe | B  | N | H |
| 16 | 16 | 2 | 4 |

Direct

|             |             |             |
|-------------|-------------|-------------|
| 0.085437000 | 0.140604004 | 0.224924996 |
| 0.147648007 | 0.393332988 | 0.328298986 |
| 0.391158015 | 0.394333988 | 0.361826003 |
| 0.321884990 | 0.145636007 | 0.257382989 |
| 0.584456980 | 0.145744994 | 0.219727993 |
| 0.647189975 | 0.392910004 | 0.323226988 |
| 0.880917013 | 0.394163013 | 0.360592008 |
| 0.822251976 | 0.144554004 | 0.256238014 |
| 0.085616998 | 0.646443009 | 0.224972993 |
| 0.148425996 | 0.893383026 | 0.328981996 |
| 0.388359994 | 0.892723024 | 0.359064013 |
| 0.322223008 | 0.641059995 | 0.257346004 |
| 0.584612012 | 0.640893996 | 0.219859004 |
| 0.645891011 | 0.893360019 | 0.324678004 |
| 0.881280005 | 0.892603993 | 0.360446006 |
| 0.822251022 | 0.641930997 | 0.256265998 |
| 0.995884001 | 0.143640995 | 0.317539990 |
| 0.208414003 | 0.393381000 | 0.224409997 |
| 0.470894009 | 0.393359005 | 0.265747011 |
| 0.265105993 | 0.146705002 | 0.359495014 |
| 0.497905999 | 0.143546999 | 0.313407004 |
| 0.710328996 | 0.393150002 | 0.220586002 |
| 0.973178029 | 0.393355012 | 0.268611997 |
| 0.756877005 | 0.143095002 | 0.359856009 |
| 0.996268988 | 0.643157005 | 0.317440987 |
| 0.211652994 | 0.893423021 | 0.222532004 |
| 0.472541004 | 0.893230975 | 0.265091002 |
| 0.264746010 | 0.640376985 | 0.360002011 |
| 0.498365015 | 0.643396020 | 0.313717991 |
| 0.708050013 | 0.893441021 | 0.223844007 |
| 0.971853018 | 0.893441021 | 0.268902987 |
| 0.755891025 | 0.643483996 | 0.360642999 |
| 0.459475011 | 0.396723002 | 0.457138985 |
| 0.496463001 | 0.180666000 | 0.488555998 |
| 0.418280989 | 0.081811003 | 0.484508008 |
| 0.556595981 | 0.110459000 | 0.454133004 |
| 0.537693977 | 0.495460004 | 0.456966996 |
| 0.399610996 | 0.472171992 | 0.489989996 |

**FeB-N**

1.0

|               |              |               |
|---------------|--------------|---------------|
| 10.8163995743 | 0.0000000000 | 0.0000000000  |
| 0.0000000000  | 5.8972001076 | 0.0000000000  |
| 0.0000000000  | 0.0000000000 | 20.0000000000 |

|    |    |   |
|----|----|---|
| Fe | B  | N |
| 16 | 16 | 1 |

Direct

|             |             |             |
|-------------|-------------|-------------|
| 0.100511000 | 0.122534998 | 0.216279998 |
| 0.163140997 | 0.375546008 | 0.319561005 |
| 0.406037003 | 0.375389010 | 0.366584986 |
| 0.335364997 | 0.122813001 | 0.251354009 |
| 0.595521986 | 0.119066998 | 0.217603996 |
| 0.660800993 | 0.375512004 | 0.321397990 |
| 0.898998022 | 0.375663012 | 0.352654994 |
| 0.834231973 | 0.123741999 | 0.249309003 |
| 0.100458004 | 0.628247023 | 0.216236994 |
| 0.162106007 | 0.875231028 | 0.320089012 |
| 0.402267009 | 0.875572979 | 0.357769012 |
| 0.335303009 | 0.627848029 | 0.251408011 |
| 0.595596015 | 0.631950974 | 0.217620999 |
| 0.658451021 | 0.875626028 | 0.320648998 |
| 0.897904992 | 0.875458002 | 0.351929009 |
| 0.834218979 | 0.627400994 | 0.249289006 |
| 0.010844000 | 0.125485003 | 0.307940006 |
| 0.225091994 | 0.375369012 | 0.218710005 |
| 0.483971000 | 0.378845990 | 0.260704011 |
| 0.277561009 | 0.126389995 | 0.350423008 |
| 0.506974995 | 0.128040001 | 0.309150994 |
| 0.716723979 | 0.375582993 | 0.221397996 |
| 0.986923993 | 0.375443012 | 0.259335011 |
| 0.773549974 | 0.125345007 | 0.353617996 |
| 0.010800000 | 0.625411987 | 0.307895988 |
| 0.227421999 | 0.875322998 | 0.213189006 |
| 0.481604010 | 0.875643015 | 0.261996001 |
| 0.277610987 | 0.624260008 | 0.350609004 |
| 0.506963015 | 0.622664988 | 0.309210002 |
| 0.723267972 | 0.875581980 | 0.213108003 |
| 0.986048996 | 0.875523984 | 0.259656012 |
| 0.773441017 | 0.625774980 | 0.353615999 |
| 0.449178010 | 0.375452995 | 0.440135986 |

**FeB-NH**

1.0

|               |              |               |
|---------------|--------------|---------------|
| 10.8163995743 | 0.0000000000 | 0.0000000000  |
| 0.0000000000  | 5.8972001076 | 0.0000000000  |
| 0.0000000000  | 0.0000000000 | 20.0000000000 |

|    |    |   |   |
|----|----|---|---|
| Fe | B  | N | H |
| 16 | 16 | 1 | 1 |

Direct

|             |             |             |
|-------------|-------------|-------------|
| 0.101538002 | 0.124429002 | 0.215307996 |
| 0.161440000 | 0.374725014 | 0.318545997 |
| 0.399836987 | 0.376672000 | 0.367350996 |
| 0.336971998 | 0.126369998 | 0.251976997 |
| 0.596184015 | 0.119012997 | 0.216938004 |
| 0.662567973 | 0.375034004 | 0.319788992 |
| 0.900484025 | 0.375384986 | 0.351985991 |
| 0.835393012 | 0.122639000 | 0.248576999 |
| 0.101632997 | 0.625977993 | 0.215381995 |
| 0.162202001 | 0.875808001 | 0.319175005 |
| 0.401611000 | 0.874414980 | 0.357387990 |
| 0.336970001 | 0.624239028 | 0.251922011 |
| 0.596313000 | 0.631280005 | 0.216940001 |
| 0.659377992 | 0.875274003 | 0.320719987 |
| 0.899480999 | 0.874942005 | 0.351841003 |
| 0.835471988 | 0.627649009 | 0.248541996 |
| 0.011332000 | 0.124955997 | 0.307503998 |
| 0.226523995 | 0.371834010 | 0.216739997 |
| 0.486474007 | 0.375144988 | 0.261736989 |
| 0.276403010 | 0.125916004 | 0.350207001 |
| 0.509482026 | 0.128984004 | 0.309785008 |
| 0.717772007 | 0.375102997 | 0.219812006 |
| 0.986752987 | 0.375178993 | 0.258534014 |
| 0.775250971 | 0.125117004 | 0.352851987 |
| 0.011575000 | 0.625416994 | 0.307487994 |
| 0.227603003 | 0.875280976 | 0.214873999 |
| 0.483303994 | 0.875274003 | 0.262681007 |
| 0.275485009 | 0.624718010 | 0.350071013 |
| 0.509769976 | 0.621357977 | 0.309637010 |
| 0.723084986 | 0.875196993 | 0.213042006 |
| 0.987425983 | 0.875160992 | 0.258971006 |
| 0.775038004 | 0.625172019 | 0.353040993 |
| 0.404193997 | 0.381054997 | 0.450533003 |
| 0.343692005 | 0.389201999 | 0.489239991 |

**FeB-NH2**

1.0

|               |              |               |
|---------------|--------------|---------------|
| 10.8163995743 | 0.0000000000 | 0.0000000000  |
| 0.0000000000  | 5.8972001076 | 0.0000000000  |
| 0.0000000000  | 0.0000000000 | 20.0000000000 |

|    |    |   |   |
|----|----|---|---|
| Fe | B  | N | H |
| 16 | 16 | 1 | 2 |

Direct

|             |             |             |
|-------------|-------------|-------------|
| 0.099152997 | 0.120787002 | 0.215849996 |
| 0.157795995 | 0.374060988 | 0.319359988 |
| 0.401872009 | 0.375961006 | 0.364602000 |
| 0.332814008 | 0.125195995 | 0.253724009 |
| 0.590267003 | 0.127412006 | 0.216718003 |
| 0.657480001 | 0.375519007 | 0.319846004 |
| 0.894169986 | 0.376552999 | 0.351727009 |
| 0.830488026 | 0.127324998 | 0.248377994 |
| 0.099110998 | 0.629369020 | 0.215939000 |
| 0.157868996 | 0.876160979 | 0.320867002 |
| 0.397592008 | 0.874414027 | 0.359847009 |
| 0.332709998 | 0.624916971 | 0.253681004 |
| 0.590521991 | 0.622729003 | 0.216665998 |
| 0.657012999 | 0.874732971 | 0.319382012 |
| 0.894303977 | 0.873579979 | 0.351696014 |
| 0.830578029 | 0.622705996 | 0.248346999 |
| 0.006721000 | 0.125434995 | 0.307460010 |
| 0.222128004 | 0.375090986 | 0.218282998 |
| 0.479012012 | 0.375027001 | 0.263301015 |
| 0.273514003 | 0.128603995 | 0.352232993 |
| 0.506792009 | 0.126877993 | 0.311199009 |
| 0.715699971 | 0.374823004 | 0.214532003 |
| 0.984768987 | 0.374927014 | 0.258612007 |
| 0.770501018 | 0.124949001 | 0.352854013 |
| 0.007570000 | 0.624719977 | 0.307240993 |
| 0.226554006 | 0.875083029 | 0.214636996 |
| 0.480504990 | 0.875102997 | 0.263913006 |
| 0.272756010 | 0.621502995 | 0.351612002 |
| 0.506877005 | 0.623355985 | 0.310923994 |
| 0.713882029 | 0.875379026 | 0.218134999 |
| 0.983199000 | 0.875281990 | 0.259283990 |
| 0.769200981 | 0.625522017 | 0.354645997 |
| 0.440627009 | 0.382243991 | 0.454268992 |
| 0.375743985 | 0.384308010 | 0.491167992 |
| 0.527848005 | 0.394612014 | 0.471067995 |

**FeB2-N2**

1.0

|               |              |               |
|---------------|--------------|---------------|
| 9.0576000214  | 0.0000000000 | 0.0000000000  |
| -4.5288000107 | 7.8441117158 | 0.0000000000  |
| 0.0000000000  | 0.0000000000 | 20.0000000000 |

|    |    |   |
|----|----|---|
| Fe | B  | N |
| 9  | 18 | 2 |

Direct

|             |             |             |
|-------------|-------------|-------------|
| 0.000567000 | 0.000842000 | 0.404238999 |
| 0.365200013 | 0.031567000 | 0.431297988 |
| 0.666601002 | 0.031909999 | 0.431230009 |
| 0.968870997 | 0.333003014 | 0.432101995 |
| 0.363918006 | 0.332938999 | 0.432289004 |
| 0.666752994 | 0.333896011 | 0.421348989 |
| 0.969112992 | 0.635182023 | 0.431484997 |
| 0.332643986 | 0.665466011 | 0.404688001 |
| 0.666384995 | 0.635312021 | 0.431281000 |
| 0.113342002 | 0.226763994 | 0.442133993 |
| 0.210921004 | 0.104891002 | 0.454216003 |
| 0.451234996 | 0.223174006 | 0.494603008 |
| 0.559252024 | 0.118357003 | 0.494985998 |
| 0.773423016 | 0.225875005 | 0.494874001 |
| 0.894092977 | 0.104969002 | 0.454061002 |
| 0.122385003 | 0.561092973 | 0.454602003 |
| 0.219609007 | 0.439256012 | 0.442191005 |
| 0.438854992 | 0.561249971 | 0.454468995 |
| 0.559683025 | 0.440546006 | 0.494080991 |
| 0.774071991 | 0.548097014 | 0.493842989 |
| 0.880895972 | 0.440326989 | 0.494369000 |
| 0.113756999 | 0.886318982 | 0.440486997 |
| 0.220042005 | 0.780288994 | 0.441078007 |
| 0.438919991 | 0.877604008 | 0.453642011 |
| 0.560500979 | 0.780497015 | 0.440815002 |
| 0.772799015 | 0.886533022 | 0.440358996 |
| 0.894712985 | 0.789309025 | 0.453267008 |
| 0.666393995 | 0.331968993 | 0.328357995 |
| 0.666592002 | 0.332663000 | 0.271643996 |

**FeB2-N2H**

1.0

|               |              |               |
|---------------|--------------|---------------|
| 9.0576000214  | 0.0000000000 | 0.0000000000  |
| -4.5288000107 | 7.8441117158 | 0.0000000000  |
| 0.0000000000  | 0.0000000000 | 20.0000000000 |

|    |    |   |   |
|----|----|---|---|
| Fe | B  | N | H |
| 9  | 18 | 2 | 1 |

Direct

|             |             |             |
|-------------|-------------|-------------|
| 0.998694003 | 0.000655000 | 0.406803012 |
| 0.364093006 | 0.030673999 | 0.431697994 |
| 0.666651011 | 0.029468000 | 0.433256000 |
| 0.969152987 | 0.332040995 | 0.433174014 |
| 0.362740010 | 0.333297998 | 0.433932006 |
| 0.667505980 | 0.333608001 | 0.397964001 |
| 0.968235016 | 0.634806991 | 0.431448996 |
| 0.333898991 | 0.665493011 | 0.406998992 |
| 0.665392995 | 0.636196017 | 0.432958007 |
| 0.112999000 | 0.226278007 | 0.443497986 |
| 0.211133003 | 0.104790002 | 0.455572009 |
| 0.451025993 | 0.225070000 | 0.494132996 |
| 0.558317006 | 0.118065000 | 0.494222999 |
| 0.773054004 | 0.225966007 | 0.494361997 |
| 0.893679976 | 0.105063997 | 0.457352996 |
| 0.121168002 | 0.560769022 | 0.455552012 |
| 0.219170004 | 0.439357013 | 0.443179995 |
| 0.438481003 | 0.560267985 | 0.457253993 |
| 0.559072018 | 0.439857990 | 0.494004995 |
| 0.773950994 | 0.547828019 | 0.493912995 |
| 0.881395996 | 0.440968007 | 0.494244993 |
| 0.112942003 | 0.885958016 | 0.440521002 |
| 0.219275996 | 0.779645979 | 0.440789014 |
| 0.438152999 | 0.877830029 | 0.455839008 |
| 0.559578001 | 0.779758990 | 0.443664998 |
| 0.772719026 | 0.885948002 | 0.443192989 |
| 0.894110024 | 0.787833989 | 0.455199003 |
| 0.682458997 | 0.345322013 | 0.314336002 |
| 0.712100983 | 0.369053990 | 0.254981011 |
| 0.615670979 | 0.289669991 | 0.222714007 |

**FeB2-NHNH**

1.0

|               |              |               |
|---------------|--------------|---------------|
| 9.0576000214  | 0.0000000000 | 0.0000000000  |
| -4.5288000107 | 7.8441117158 | 0.0000000000  |
| 0.0000000000  | 0.0000000000 | 20.0000000000 |

|    |    |   |   |
|----|----|---|---|
| Fe | B  | N | H |
| 9  | 18 | 2 | 2 |

Direct

|             |             |             |
|-------------|-------------|-------------|
| 0.960491002 | 0.981303990 | 0.418583006 |
| 0.370086014 | 0.027136000 | 0.418978989 |
| 0.671384990 | 0.009029000 | 0.460224986 |
| 0.961376011 | 0.323302001 | 0.408574998 |
| 0.376300991 | 0.347184002 | 0.409404010 |
| 0.668829978 | 0.334307998 | 0.427349001 |
| 0.970308006 | 0.646945000 | 0.418258995 |
| 0.380488008 | 0.693584979 | 0.415176988 |
| 0.667069972 | 0.664736986 | 0.457846999 |
| 0.116714001 | 0.229877993 | 0.417320013 |
| 0.210523993 | 0.108268000 | 0.421730012 |
| 0.437794000 | 0.223463997 | 0.478228003 |
| 0.550140977 | 0.120755002 | 0.485799015 |
| 0.799390018 | 0.243480995 | 0.486925989 |
| 0.913228989 | 0.131644994 | 0.467730999 |
| 0.129537001 | 0.565476000 | 0.415600002 |
| 0.222736001 | 0.444117993 | 0.411738008 |
| 0.425399989 | 0.542733014 | 0.464394003 |
| 0.540661991 | 0.430792987 | 0.485466987 |
| 0.786366999 | 0.550806999 | 0.482798010 |
| 0.901610017 | 0.449755996 | 0.476615012 |
| 0.117040999 | 0.892408013 | 0.428153008 |
| 0.222287998 | 0.780062973 | 0.427239001 |
| 0.430056006 | 0.885685980 | 0.470743001 |
| 0.545678020 | 0.774846017 | 0.487237990 |
| 0.791311979 | 0.896987021 | 0.488514006 |
| 0.907863975 | 0.784790993 | 0.471266001 |
| 0.666359007 | 0.353814006 | 0.333431989 |
| 0.636964977 | 0.245006993 | 0.286565006 |
| 0.653214991 | 0.304484010 | 0.240517005 |
| 0.702183008 | 0.477396995 | 0.318747997 |

**FeB2-NNH2**

1.0

|               |              |               |
|---------------|--------------|---------------|
| 9.0576000214  | 0.0000000000 | 0.0000000000  |
| -4.5288000107 | 7.8441117158 | 0.0000000000  |
| 0.0000000000  | 0.0000000000 | 20.0000000000 |

|    |    |   |   |
|----|----|---|---|
| Fe | B  | N | H |
| 9  | 18 | 2 | 2 |

Direct

|             |             |             |
|-------------|-------------|-------------|
| 0.998999000 | 0.998064995 | 0.406181991 |
| 0.363404006 | 0.030439001 | 0.429280996 |
| 0.667101026 | 0.030406000 | 0.429280013 |
| 0.968909025 | 0.333303005 | 0.428961992 |
| 0.364452004 | 0.333332002 | 0.428905010 |
| 0.666575015 | 0.333092004 | 0.408457011 |
| 0.970003009 | 0.636125982 | 0.429199010 |
| 0.334452003 | 0.668775022 | 0.406397015 |
| 0.666161001 | 0.636155009 | 0.429277003 |
| 0.113785997 | 0.227509007 | 0.439312994 |
| 0.212469995 | 0.106868997 | 0.453657001 |
| 0.454712003 | 0.227519006 | 0.492101014 |
| 0.560585022 | 0.121136002 | 0.492255002 |
| 0.772840023 | 0.227521002 | 0.492114991 |
| 0.894442976 | 0.106882997 | 0.453729987 |
| 0.120862998 | 0.559741974 | 0.453777999 |
| 0.219624996 | 0.439199001 | 0.439348012 |
| 0.438908011 | 0.559688985 | 0.453824013 |
| 0.560486019 | 0.439166993 | 0.492101014 |
| 0.772780001 | 0.545485020 | 0.492150009 |
| 0.878717005 | 0.439186990 | 0.492096990 |
| 0.113485999 | 0.886139989 | 0.441132009 |
| 0.219825000 | 0.780498981 | 0.441361994 |
| 0.440429002 | 0.880809009 | 0.455058008 |
| 0.560727000 | 0.780512989 | 0.441435009 |
| 0.772718012 | 0.886152983 | 0.441233993 |
| 0.893009007 | 0.785889030 | 0.454728991 |
| 0.666310012 | 0.332046002 | 0.325466007 |
| 0.665865004 | 0.330487013 | 0.260919005 |
| 0.610216022 | 0.217665002 | 0.235550001 |
| 0.721606016 | 0.442270994 | 0.233855993 |



**FeB2-NHNH2**

1.0

|               |              |               |
|---------------|--------------|---------------|
| 9.0576000214  | 0.0000000000 | 0.0000000000  |
| -4.5288000107 | 7.8441117158 | 0.0000000000  |
| 0.0000000000  | 0.0000000000 | 20.0000000000 |

|    |    |   |   |
|----|----|---|---|
| Fe | B  | N | H |
| 9  | 18 | 2 | 3 |

Direct

|             |             |             |
|-------------|-------------|-------------|
| 0.990544975 | 0.981257975 | 0.406798005 |
| 0.357836008 | 0.024072999 | 0.432197988 |
| 0.661073983 | 0.025345000 | 0.429998994 |
| 0.966454983 | 0.341937989 | 0.410356998 |
| 0.371050000 | 0.340288013 | 0.411962003 |
| 0.670418978 | 0.345364004 | 0.419586986 |
| 0.972033024 | 0.655689001 | 0.440847993 |
| 0.339428991 | 0.689357996 | 0.405943006 |
| 0.679538012 | 0.654142022 | 0.437799007 |
| 0.113578998 | 0.230848998 | 0.414559990 |
| 0.214995995 | 0.119052999 | 0.441846997 |
| 0.445131004 | 0.233014002 | 0.483601987 |
| 0.563403010 | 0.129372999 | 0.485139012 |
| 0.784488022 | 0.232493997 | 0.482858002 |
| 0.899380028 | 0.118574001 | 0.438937992 |
| 0.117209002 | 0.559504986 | 0.446330011 |
| 0.220669001 | 0.445165008 | 0.418655008 |
| 0.438686013 | 0.561639011 | 0.443114012 |
| 0.546312988 | 0.441035986 | 0.486736000 |
| 0.765293002 | 0.536327004 | 0.492922008 |
| 0.890761971 | 0.439244986 | 0.486761004 |
| 0.117505997 | 0.898813009 | 0.455565989 |
| 0.218484998 | 0.782209992 | 0.451745987 |
| 0.440935999 | 0.884398997 | 0.463117987 |
| 0.559435010 | 0.781801999 | 0.447234005 |
| 0.775933981 | 0.898104012 | 0.451710999 |
| 0.897623003 | 0.802320004 | 0.472764999 |
| 0.698252976 | 0.384122998 | 0.328761011 |
| 0.631699979 | 0.278889000 | 0.274794996 |
| 0.585354984 | 0.154756993 | 0.288246989 |
| 0.704984009 | 0.316062003 | 0.232563004 |
| 0.762320995 | 0.509061992 | 0.313109010 |

**FeB2-NH2NH2**

1.0

|               |              |               |
|---------------|--------------|---------------|
| 9.0576000214  | 0.0000000000 | 0.0000000000  |
| -4.5288000107 | 7.8441117158 | 0.0000000000  |
| 0.0000000000  | 0.0000000000 | 20.0000000000 |

|    |    |   |   |
|----|----|---|---|
| Fe | B  | N | H |
| 9  | 18 | 2 | 4 |

Direct

|             |             |             |
|-------------|-------------|-------------|
| 0.956216991 | 0.971175015 | 0.400225013 |
| 0.359676987 | 0.039027002 | 0.433108002 |
| 0.650403023 | 0.003288000 | 0.429726005 |
| 0.939480007 | 0.327176005 | 0.397588015 |
| 0.354626000 | 0.346967012 | 0.414730996 |
| 0.637324989 | 0.347658992 | 0.492572010 |
| 0.963348985 | 0.655638993 | 0.417290986 |
| 0.352153003 | 0.682927012 | 0.401582003 |
| 0.646565020 | 0.628633976 | 0.470115006 |
| 0.095559999 | 0.223578006 | 0.404938996 |
| 0.194034994 | 0.111929998 | 0.429538012 |
| 0.377891988 | 0.212543994 | 0.493921995 |
| 0.553506970 | 0.104652002 | 0.489450008 |
| 0.766470015 | 0.229893997 | 0.470218986 |
| 0.886565983 | 0.116756000 | 0.440499008 |
| 0.108329996 | 0.560500026 | 0.419829994 |
| 0.200086996 | 0.438098013 | 0.406370997 |
| 0.400967002 | 0.548575997 | 0.463813007 |
| 0.454430997 | 0.416406989 | 0.508876026 |
| 0.828217030 | 0.586843014 | 0.498867005 |
| 0.883849978 | 0.445726007 | 0.469280005 |
| 0.111239001 | 0.896884978 | 0.429646999 |
| 0.214774996 | 0.784074008 | 0.425787002 |
| 0.421757996 | 0.878051996 | 0.460857987 |
| 0.541788995 | 0.770223975 | 0.462904990 |
| 0.763347030 | 0.882604003 | 0.460373998 |
| 0.891795993 | 0.791383982 | 0.468149006 |
| 0.747412980 | 0.329991013 | 0.329919994 |
| 0.739347994 | 0.333431989 | 0.256945997 |
| 0.742935002 | 0.228385001 | 0.239552006 |
| 0.851466000 | 0.434017003 | 0.240859002 |
| 0.730009973 | 0.428822011 | 0.346285999 |
| 0.631615996 | 0.228504002 | 0.345853001 |

**FeB2-N**

FeB2

1.0

|               |              |               |
|---------------|--------------|---------------|
| 9.0576000214  | 0.0000000000 | 0.0000000000  |
| -4.5288000107 | 7.8441117158 | 0.0000000000  |
| 0.0000000000  | 0.0000000000 | 20.0000000000 |

|    |    |   |
|----|----|---|
| Fe | B  | N |
| 9  | 18 | 1 |

Direct

|             |             |             |
|-------------|-------------|-------------|
| 0.983170986 | 0.966647983 | 0.427170992 |
| 0.374933988 | 0.024754999 | 0.438901007 |
| 0.649478018 | 0.024561999 | 0.439121991 |
| 0.964865983 | 0.323345006 | 0.435826004 |
| 0.358215988 | 0.322849005 | 0.435647994 |
| 0.669978976 | 0.339915991 | 0.418071002 |
| 0.949965000 | 0.630599976 | 0.419014990 |
| 0.312539011 | 0.624539971 | 0.382618010 |
| 0.681012988 | 0.630711973 | 0.419070989 |
| 0.104580000 | 0.209501997 | 0.451409012 |
| 0.211870000 | 0.093332000 | 0.465689987 |
| 0.451570988 | 0.229670003 | 0.498275012 |
| 0.567690015 | 0.135752007 | 0.502601027 |
| 0.778002977 | 0.229663998 | 0.498268992 |
| 0.881394029 | 0.093617000 | 0.465788990 |
| 0.116609998 | 0.557901978 | 0.439159989 |
| 0.213975996 | 0.427477002 | 0.442016006 |
| 0.441747993 | 0.557422996 | 0.439031005 |
| 0.570580006 | 0.447248995 | 0.492527008 |
| 0.784662008 | 0.569337010 | 0.511781991 |
| 0.876348019 | 0.447041988 | 0.492655009 |
| 0.123954996 | 0.872807026 | 0.453467011 |
| 0.217819005 | 0.770826995 | 0.418190002 |
| 0.431944013 | 0.863780975 | 0.398299009 |
| 0.552949011 | 0.770682991 | 0.418505013 |
| 0.748806000 | 0.872879028 | 0.453597009 |
| 0.883659005 | 0.766292989 | 0.484048992 |
| 0.764084995 | 0.528066993 | 0.363074988 |

**FeB2-NH**

1.0

|               |              |               |
|---------------|--------------|---------------|
| 9.0576000214  | 0.0000000000 | 0.0000000000  |
| -4.5288000107 | 7.8441117158 | 0.0000000000  |
| 0.0000000000  | 0.0000000000 | 20.0000000000 |

|    |    |   |   |
|----|----|---|---|
| Fe | B  | N | H |
| 9  | 18 | 1 | 1 |

Direct

|             |             |             |
|-------------|-------------|-------------|
| 0.028306000 | 0.056634001 | 0.387288004 |
| 0.383929014 | 0.044436999 | 0.412337989 |
| 0.660564005 | 0.044440001 | 0.412328005 |
| 0.979875982 | 0.341904998 | 0.443147004 |
| 0.362118989 | 0.341769993 | 0.443233997 |
| 0.659802020 | 0.319518000 | 0.437328994 |
| 0.963725984 | 0.644055009 | 0.426764995 |
| 0.343017012 | 0.685698986 | 0.425482005 |
| 0.680399001 | 0.644116998 | 0.426753998 |
| 0.117366999 | 0.234611005 | 0.453992009 |
| 0.218437001 | 0.105301999 | 0.444986999 |
| 0.441119999 | 0.207001999 | 0.493346006 |
| 0.550446987 | 0.100610003 | 0.507830024 |
| 0.766058981 | 0.206909001 | 0.493301004 |
| 0.887031019 | 0.105364002 | 0.444961995 |
| 0.119125001 | 0.577881992 | 0.467290014 |
| 0.228294000 | 0.456463009 | 0.461400986 |
| 0.458878011 | 0.577908993 | 0.467343986 |
| 0.564374030 | 0.452342987 | 0.493972003 |
| 0.773954988 | 0.547719002 | 0.493185997 |
| 0.887821019 | 0.452154011 | 0.493916005 |
| 0.120637998 | 0.900977015 | 0.410016000 |
| 0.215298995 | 0.797412992 | 0.441947013 |
| 0.452105999 | 0.904175997 | 0.472344011 |
| 0.582249999 | 0.797416985 | 0.441958994 |
| 0.780534029 | 0.901090980 | 0.409992993 |
| 0.907001019 | 0.813929021 | 0.394733995 |
| 0.585651994 | 0.171185002 | 0.362428993 |
| 0.604961991 | 0.209531993 | 0.313475013 |

**FeB2-NH2**

1.0

|               |              |               |
|---------------|--------------|---------------|
| 9.0576000214  | 0.0000000000 | 0.0000000000  |
| -4.5288000107 | 7.8441117158 | 0.0000000000  |
| 0.0000000000  | 0.0000000000 | 20.0000000000 |

|    |    |   |   |
|----|----|---|---|
| Fe | B  | N | H |
| 9  | 18 | 1 | 2 |

Direct

|             |             |             |
|-------------|-------------|-------------|
| 0.016027000 | 0.980715990 | 0.409476012 |
| 0.373122007 | 0.016347000 | 0.446541011 |
| 0.668289006 | 0.020914000 | 0.434789985 |
| 0.979077995 | 0.336997986 | 0.416832000 |
| 0.389737993 | 0.329807997 | 0.408526003 |
| 0.672438979 | 0.330707997 | 0.410200000 |
| 0.993228972 | 0.653636992 | 0.440564007 |
| 0.352452993 | 0.691901028 | 0.409828991 |
| 0.693005025 | 0.647231996 | 0.435259014 |
| 0.129427999 | 0.228346005 | 0.417791009 |
| 0.234944001 | 0.119079001 | 0.450578004 |
| 0.461059004 | 0.233992994 | 0.490245014 |
| 0.584087014 | 0.131725997 | 0.494964987 |
| 0.798286021 | 0.228284001 | 0.487619996 |
| 0.910727978 | 0.110390998 | 0.438555986 |
| 0.133337006 | 0.553547978 | 0.450042993 |
| 0.236397997 | 0.442250997 | 0.416768014 |
| 0.453085989 | 0.556313992 | 0.435885996 |
| 0.567497015 | 0.439433008 | 0.486856997 |
| 0.785614014 | 0.541592002 | 0.491984010 |
| 0.900892019 | 0.438015997 | 0.488005996 |
| 0.131155998 | 0.893836975 | 0.463331997 |
| 0.233031005 | 0.774177015 | 0.464356989 |
| 0.455801994 | 0.872770011 | 0.474693000 |
| 0.573988974 | 0.775141001 | 0.449716985 |
| 0.790161014 | 0.893061996 | 0.446765006 |
| 0.908443987 | 0.793936014 | 0.471280992 |
| 0.526975989 | 0.319032997 | 0.333620995 |
| 0.472155005 | 0.205179006 | 0.309163004 |
| 0.565312028 | 0.415780991 | 0.299744993 |
